# Supplementary material for: Prokaryotic communities from a lava tube cave in La Palma Island (Spain) are involved in the biogeochemical cycle of major elements
Source: PeerJ journal article supplement (doi:10.7717/peerj.11386), 2021-05-11
Supplement: Suppl_file_Fuente_Canaria_v2.pdf [file Suppl_file_Fuente_Canaria_v2.pdf]

## Supplemental file

### Prokaryotic communities from a lava tube cave in La Palma Island (Spain) are involved in the biogeochemical cycle of major elements

Jose Luis Gonzalez-Pimentel<sup>1</sup>, Tamara Martin-Pozas<sup>2</sup>, Valme Jurado<sup>3</sup>, Ana Zelia Miller<sup>1</sup>, Ana Teresa Caldeira<sup>1</sup>, Octavio Fernandez-Lorenzo<sup>4</sup>, Sergio Sanchez-Moral<sup>2</sup> and Cesareo Saiz-Jimenez<sup>3</sup>

<sup>1</sup>Laboratorio HERCULES, Universidade de Evora, 7000-809 Evora, Portugal

<sup>2</sup>Museo Nacional de Ciencias Naturales (MNCN-CSIC), 28006 Madrid, Spain

<sup>3</sup>Instituto de Recursos Naturales y Agrobiologia (IRNAS-CSIC), 41012 Sevilla, Spain

<sup>4</sup>Grupo de Espeleologia Tebexcorade, La Palma, Spain

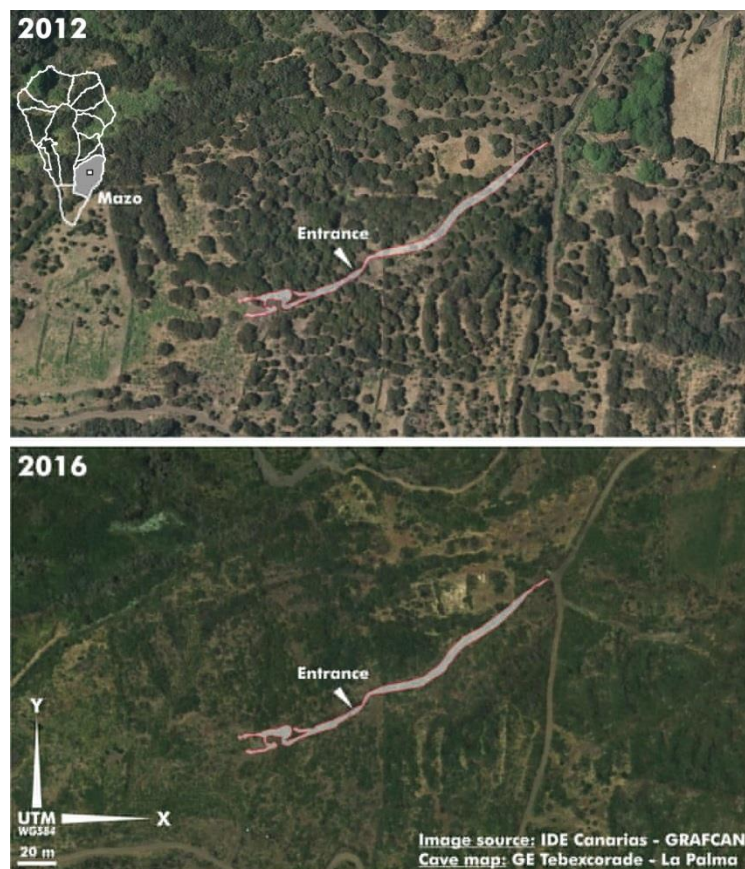

Supplemental Figure 1. Aerial photos of the cave area before the August 4, 2012 fire, and in 2016.

Fuente de la Canaria Cave opens its entrance on a midland slope facing east-southeast, which shows terraces dedicated to rainfed crops, today abandoned, and totally or partially occupied by forage plants, mainly *Chamaecytisus prolifer* subsp. *prolifer* var. *palmensis*, known locally as tagasaste palmero. The vegetation of the area was the evergreen laurel cloud forest with abundance of the wax

myrtle *Myrica faya* and the shrubby *Erica arborea* (tree heath), community known as monteverde or fayal-brezal. The entire area was devastated by a fire in 2012 affecting the surface vegetation and most heaths have been reduced to stumps that, in some cases, are sprouting again from the roots (Supplementary Fig. S1). There are still some specimens in the vicinity of the cave, particularly *Erica arborea*, a species of which one specimen is growing at the cave entrance. Tagasastes are currently the most abundant species. Small herds of cows occasionally graze on the soil above the cave.

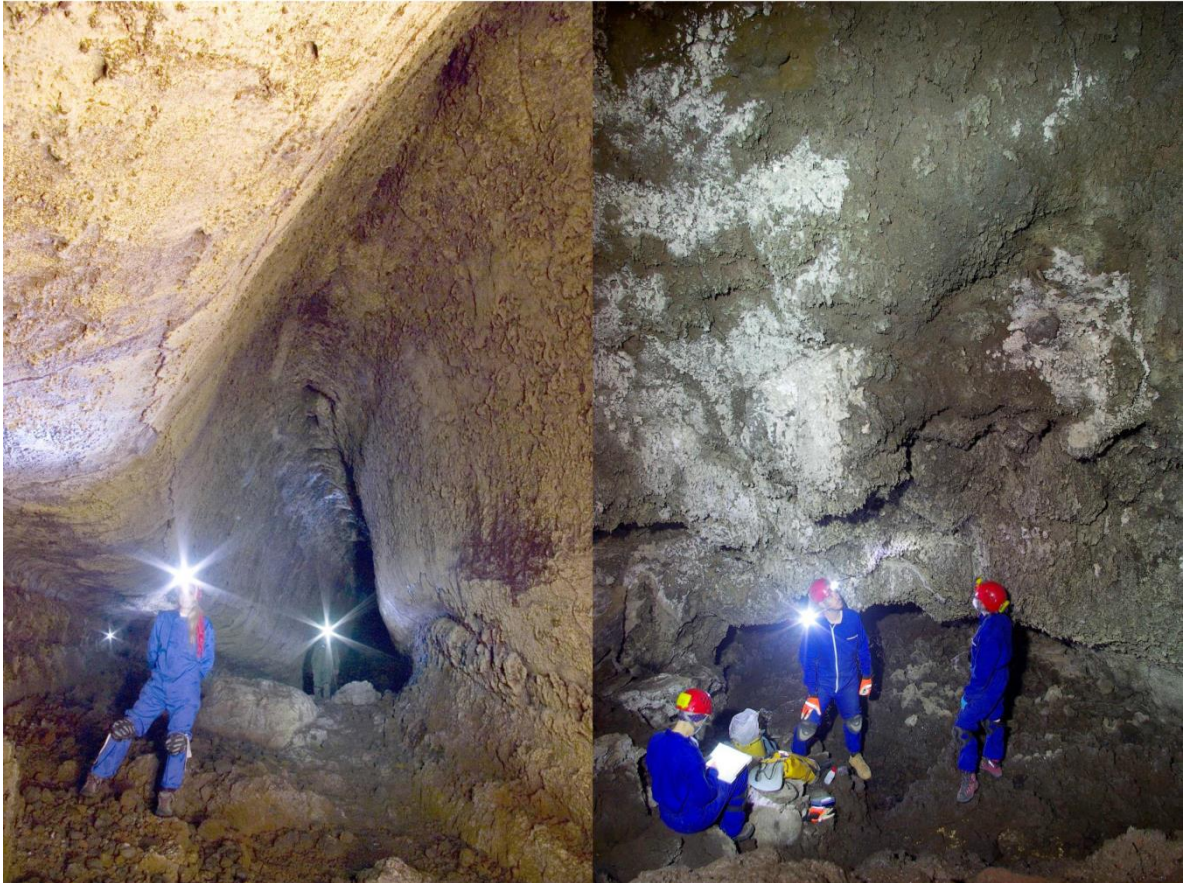

Supplemental Figure 2. Sampling in Fuente de la Canaria Cave. White stains on the walls correspond to the area of moonmilk (MZ03-10J).

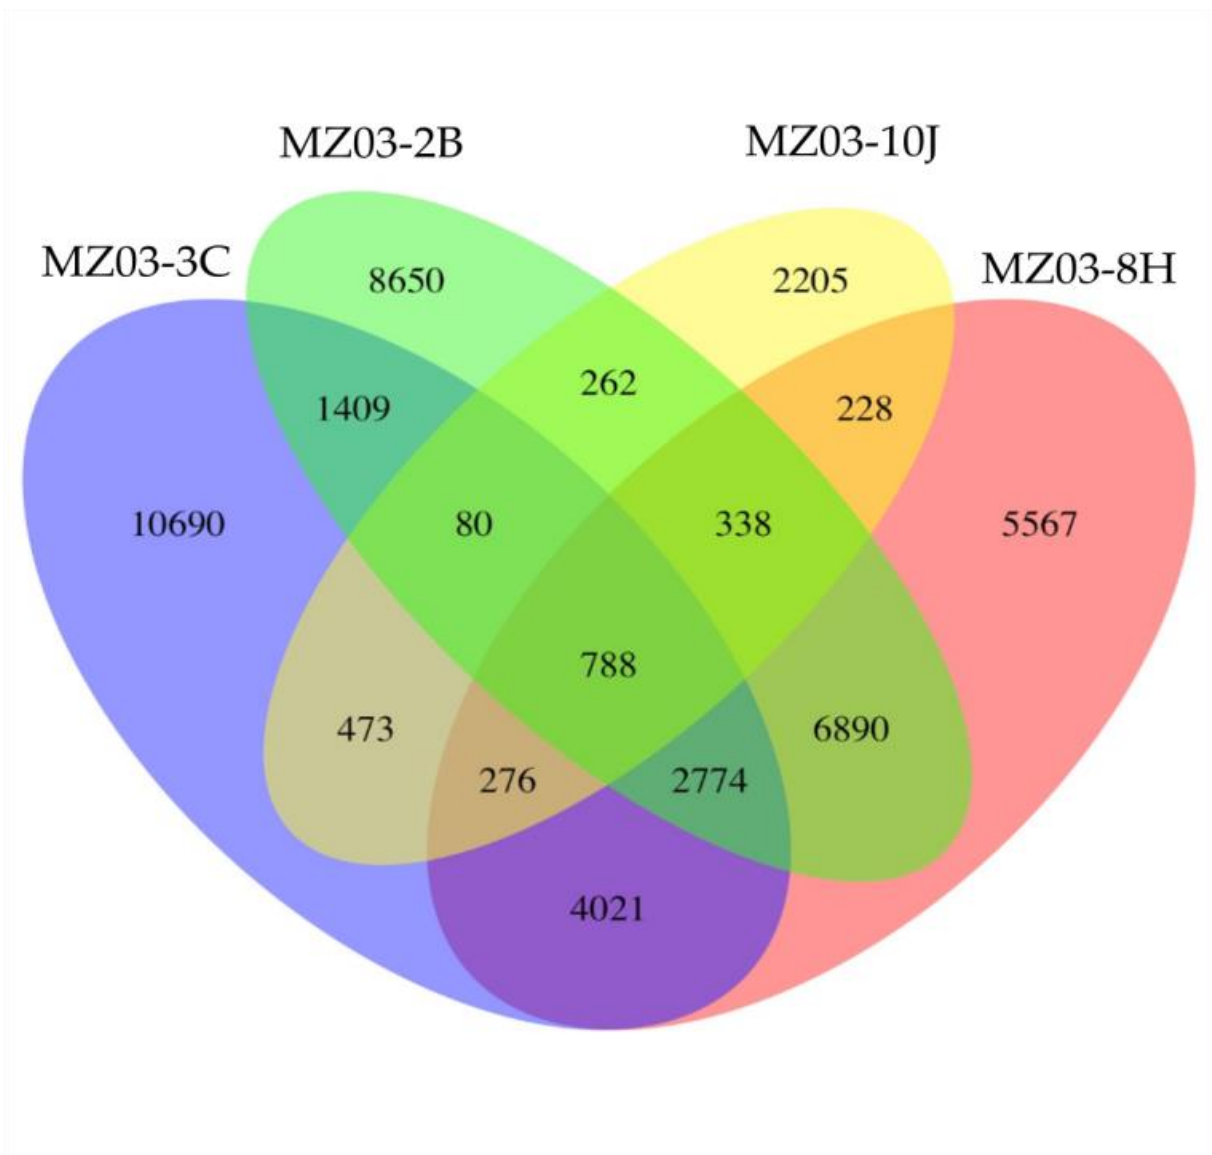

Supplemental Figure 3. Venn diagram at a distance of 0.03 of the shared OTUs among samples MZ03-3C (20511), MZ03-2B (21191), MZ03-8H (20882) and MZ03-10J (4650).

**Supplemental Table 1.** Selection of enzymes related to methane metabolism. The EC number abundance predicted by PICRUSt2 show how each dominant taxon is contributing to each predicted enzyme per sample.

| EC Number    | Enzyme description                                              | Taxa                                | Abundance |         |         |          |
|--------------|-----------------------------------------------------------------|-------------------------------------|-----------|---------|---------|----------|
|              |                                                                 |                                     | MZ03-3C   | MZ03-8H | MZ03-2B | MZ03-10J |
| EC:4.2.1.147 | 5,6,7,8-tetrahydromethanopterin hydro-lyase                     | Uncultured, <i>Beijerinckiaceae</i> | 16091     | 10177   | 5342    | 149      |
|              |                                                                 | <i>Polaromonas</i>                  | 0         | 4       | 3       | 0        |
|              |                                                                 | <i>Hyphomicrobium</i>               | 3042      | 3377    | 1769    | 773      |
|              |                                                                 | <i>Nitrospira</i>                   | 0         | 0       | 1       | 0        |
| EC:1.12.98.1 | Coenzyme F420 hydrogenase                                       | Ga0077536                           | 71422     | 28621   | 9122    | 48867    |
|              |                                                                 | IMCC26256                           | 1118      | 7513    | 4362    | 0        |
|              |                                                                 | Uncultured, <i>Acidimicrobiia</i>   | 1764      | 5435    | 2897    | 0        |
| EC:2.3.1.101 | Formylmethanofuran--tetrahydromethanopterin N-formyltransferase | Uncultured, <i>Beijerinckiaceae</i> | 16091     | 10177   | 5342    | 149      |
|              |                                                                 | <i>Polaromonas</i>                  | 0         | 4       | 3       | 0        |
|              |                                                                 | <i>Hyphomicrobium</i>               | 3034      | 3384    | 1769    | 769      |
|              |                                                                 | <i>Nitrospira</i>                   | 0         | 0       | 1       | 0        |
| EC:1.14.18.3 | Methane monooxygenase (particulate)                             | Uncultured, <i>Beijerinckiaceae</i> | 16091     | 10177   | 5342    | 149      |

|             |                                                |                                        |       |       |       |      |
|-------------|------------------------------------------------|----------------------------------------|-------|-------|-------|------|
|             |                                                | <i>Hyphomicrobium</i>                  | 24    | 8     | 1     | 5    |
|             |                                                | <i>Nitrospira</i>                      | 6     | 9     | 5     | 0    |
|             |                                                | MND1                                   | 12    | 432   | 259   | 1    |
|             |                                                | IS-44                                  | 2437  | 3783  | 2690  | 43   |
| EC:1.1.2.7  | Methanol dehydrogenase                         | Uncultured,<br><i>Beijerinckiaceae</i> | 32182 | 20354 | 10684 | 298  |
|             |                                                | <i>Hyphomicrobium</i>                  | 6024  | 6756  | 3566  | 1566 |
|             |                                                | IS-44                                  | 4     | 0     | 0     | 0    |
| EC:3.5.4.27 | Methenyltetrahydromethanopterin cyclohydrolase | Uncultured,<br><i>Beijerinckiaceae</i> | 16091 | 10177 | 5342  | 149  |
|             |                                                | <i>Nitrospira</i>                      | 0     | 0     | 1     | 0    |
|             |                                                | <i>Polaromonas</i>                     | 0     | 4     | 3     | 0    |
|             |                                                | <i>Hyphomicrobium</i>                  | 3034  | 3384  | 1769  | 769  |
| EC:1.4.9.1  | Methylamine dehydrogenase                      | <i>Hyphomicrobium</i>                  | 5532  | 4384  | 1930  | 512  |
|             |                                                | <i>Polaromonas</i>                     | 0     | 3     | 18    | 0    |
|             |                                                | MND1                                   | 1     | 22    | 24    | 1    |
|             |                                                | IS-44                                  | 0     | 1     | 3     | 2    |

|                |                              |                       |      |      |      |      |
|----------------|------------------------------|-----------------------|------|------|------|------|
| EC:1.5.8.2     | Trimethylamine dehydrogenase | <i>Hyphomicrobium</i> | 4749 | 2883 | 1333 | 2061 |
| EC:1.14.13.148 | Trimethylamine monooxygenase | <i>Hyphomicrobium</i> | 154  | 1146 | 753  | 510  |

**Supplemental Table 2.** Selection of enzymes related to sulfur metabolism. The EC number abundance predicted by PICRUSt2 show how each dominant taxon is contributing to each predicted enzyme per sample.

| EC Number   | Enzyme description    | Taxa                                | Abundance |         |         |          |
|-------------|-----------------------|-------------------------------------|-----------|---------|---------|----------|
|             |                       |                                     | MZ03-3C   | MZ03-8H | MZ03-2B | MZ03-10J |
| EC:2.7.1.25 | adenyl-sulfate kinase | <i>wb1-P19</i>                      | 47872     | 17264   | 5766    | 299      |
|             |                       | Uncultured, <i>Beijerinckiaceae</i> | 16091     | 10177   | 5342    | 149      |
|             |                       | <i>Acidobacteria</i> Subdivision 2  | 943       | 4429    | 3696    | 1        |
|             |                       | PLTA13                              | 6736      | 1416    | 79      | 8        |
|             |                       | IMCC26256                           | 1118      | 7513    | 4362    | 0        |
|             |                       | Ga0077536                           | 71548     | 28635   | 9127    | 51710    |
|             |                       | <i>Nitrospira</i>                   | 17929     | 18973   | 13938   | 1513     |
|             |                       | Uncultured, <i>Euzebyaceae</i>      | 9567      | 2032    | 7       | 0        |
|             |                       | Uncultured, <i>Acidimicrobiia</i>   | 943       | 4429    | 3696    | 1        |
|             |                       | <i>Crossiella</i>                   | 32800     | 12958   | 5205    | 1450     |

|            |                              |                                        |        |       |       |        |
|------------|------------------------------|----------------------------------------|--------|-------|-------|--------|
|            |                              | Elev-16S-976 ( <i>Actinobacteria</i> ) | 1624   | 3011  | 3365  | 19     |
|            |                              | <i>Hyphomicrobium</i>                  | 2809   | 4134  | 2226  | 1046   |
|            |                              | IS-44                                  | 1      | 1     | 0     | 0      |
| EC:2.7.7.4 | sulfate adenylyltransferase. | wb1-P19                                | 95744  | 34528 | 11532 | 598    |
|            |                              | Uncultured, <i>Beijerinckiaceae</i>    | 64364  | 40708 | 21368 | 596    |
|            |                              | <i>Acidobacteria</i> Subdivision 2     | 1886   | 8858  | 7392  | 2      |
|            |                              | PLTA13                                 | 21072  | 4973  | 422   | 18     |
|            |                              | <i>Steroidobacter</i>                  | 1074   | 253   | 43    | 5032   |
|            |                              | IMCC26256                              | 2236   | 15026 | 8724  | 0      |
|            |                              | Ga0077536                              | 143393 | 57283 | 18263 | 104386 |
|            |                              | Uncultured, <i>Euzebyaceae</i>         | 28701  | 6096  | 21    | 0      |
|            |                              | 11-24 ( <i>Blastocatellia</i> )        | 6553   | 3443  | 1372  | 182    |
|            |                              | <i>Crossiella</i>                      | 81987  | 32392 | 13012 | 2900   |
|            |                              | <i>Candidatus</i> Methylomirabilis     | 2667   | 14959 | 10376 | 12     |
|            |                              | wb1-A12                                | 815    | 5563  | 3933  | 20     |
|            |                              | Elev-16S-976 ( <i>Actinobacteria</i> ) | 4060   | 7527  | 8412  | 47     |

|            |                                   |                                        |       |       |       |      |
|------------|-----------------------------------|----------------------------------------|-------|-------|-------|------|
|            |                                   | Uncultured, <i>Burkholderiaceae</i>    | 18388 | 10406 | 4478  | 4    |
|            |                                   | <i>Hyphomicrobium</i>                  | 5428  | 7182  | 3734  | 1537 |
|            |                                   | <i>Polaromonas</i>                     | 78    | 11904 | 7842  | 58   |
|            |                                   | MND1                                   | 0     | 5     | 1     | 2    |
|            |                                   | IS-44                                  | 58    | 6054  | 4322  | 0    |
|            |                                   | <i>Nitrospira</i>                      | 16612 | 19707 | 14954 | 1343 |
| EC:1.8.4.8 | phosphoadenylyl-sulfate reductase | wb1-P19                                | 47872 | 17264 | 5766  | 299  |
|            |                                   | Uncultured, <i>Beijerinckiaceae</i>    | 16091 | 10177 | 5342  | 149  |
|            |                                   | <i>Acidobacteria</i> Subdivision 2     | 943   | 4429  | 3696  | 1    |
|            |                                   | PLTA13                                 | 14336 | 3557  | 343   | 10   |
|            |                                   | <i>Steroidobacter</i>                  | 1304  | 296   | 53    | 6855 |
|            |                                   | IMCC26256                              | 1118  | 7513  | 4362  | 0    |
|            |                                   | Ga0077536                              | 423   | 27    | 14    | 3809 |
|            |                                   | Uncultured, <i>Euzebyaceae</i>         | 9567  | 2032  | 7     | 0    |
|            |                                   | <i>Crossiella</i>                      | 16414 | 6481  | 2602  | 1449 |
|            |                                   | Elev-16S-976 ( <i>Actinobacteria</i> ) | 812   | 1505  | 1682  | 9    |



|            |                                       |                                     |       |       |       |      |
|------------|---------------------------------------|-------------------------------------|-------|-------|-------|------|
|            |                                       | Uncultured, <i>Burkholderiaceae</i> | 9194  | 5203  | 2239  | 2    |
|            |                                       | Uncultured, <i>Acidimicrobiia</i>   | 1764  | 5435  | 2897  | 0    |
|            |                                       | <i>Hyphomicrobium</i>               | 3085  | 1550  | 571   | 352  |
|            |                                       | <i>Polaromonas</i>                  | 39    | 5957  | 3925  | 45   |
|            |                                       | MND1                                | 0     | 2     | 0     | 1    |
|            |                                       | IS-44                               | 783   | 3219  | 2166  | 3    |
|            |                                       | <i>Nitrospira</i>                   | 11808 | 13207 | 9935  | 893  |
| EC:1.8.1.2 | sulfite reductase (NADPH) hemoprotein | wb1-P19                             | 47872 | 17264 | 5766  | 299  |
|            |                                       | Uncultured, <i>Beijerinckiaceae</i> | 32182 | 20354 | 10684 | 298  |
|            |                                       | <i>Acidobacteria</i> Subdivision 2  | 943   | 4429  | 3696  | 1    |
|            |                                       | PLTA13                              | 14336 | 3557  | 343   | 10   |
|            |                                       | <i>Steroidobacter</i>               | 1304  | 296   | 53    | 6855 |
|            |                                       | Ga0077536                           | 549   | 41    | 19    | 6652 |
|            |                                       | Uncultured, <i>Burkholderiaceae</i> | 9194  | 5203  | 2239  | 2    |
|            |                                       | <i>Hyphomicrobium</i>               | 7686  | 7199  | 3388  | 418  |
|            |                                       | <i>Polaromonas</i>                  | 20    | 1108  | 895   | 0    |

|             |                                 |                   |        |       |       |       |
|-------------|---------------------------------|-------------------|--------|-------|-------|-------|
|             |                                 | MND1              | 6      | 24    | 14    | 2     |
|             |                                 | IS-44             | 56     | 10    | 0     | 3     |
|             |                                 | <i>Nitrospira</i> | 6      | 0     | 0     | 0     |
| EC:1.8.99.5 | dissimilatory sulfite reductase | Ga0077536         | 142844 | 57242 | 18244 | 97734 |

**Supplemental Table 3.** Selection of enzymes related to CO<sub>2</sub> fixation. The EC number abundance predicted by PICRUSt2 show how each dominant taxon is contributing to each predicted enzyme per sample.

| EC Number   | Enzyme description                | Taxa                                | Abundance |         |         |          |
|-------------|-----------------------------------|-------------------------------------|-----------|---------|---------|----------|
|             |                                   |                                     | MZ03-3C   | MZ03-8H | MZ03-2B | MZ03-10J |
| EC 4.1.1.39 | Ribulose-bisphosphate carboxylase | Ga0077536                           | 357110    | 143105  | 45610   | 244335   |
|             |                                   | Uncultured, <i>Burkholderiaceae</i> | 9194      | 5203    | 2239    | 2        |
|             |                                   | PLTA13                              | 13472     | 2832    | 158     | 16       |
|             |                                   | Uncultured, <i>Beijerinckiaceae</i> | 32182     | 20354   | 10684   | 298      |
|             |                                   | <i>Polaromonas</i>                  | 18        | 1955    | 3759    | 29       |
|             |                                   | MND1                                | 1353      | 2424    | 2781    | 63       |
|             |                                   | IS-44                               | 444       | 1457    | 2243    | 332      |

|                         |                                                    |                                     |        |        |        |        |
|-------------------------|----------------------------------------------------|-------------------------------------|--------|--------|--------|--------|
|                         |                                                    | <i>Hyphomicrobium</i>               | 491    | 1330   | 1975   | 485    |
| EC:2.7.1.19             | Phosphoribulokinase                                | Ga0077536                           | 71422  | 28621  | 9122   | 48867  |
|                         |                                                    | Uncultured, <i>Beijerinckiaceae</i> | 16091  | 10177  | 5342   | 149    |
|                         |                                                    | PLTA13                              | 6736   | 1416   | 79     | 8      |
|                         |                                                    | <i>Polaromonas</i>                  | 1      | 124    | 264    | 2      |
|                         |                                                    | MND1                                | 892    | 1567   | 1350   | 51     |
|                         |                                                    | IS-44                               | 356    | 516    | 789    | 119    |
|                         |                                                    | <i>Hyphomicrobium</i>               | 1686   | 785    | 383    | 616    |
| EC:2.3.3.8              | ATP citrate (pro-S)-lyase                          | <i>Nitrospira</i>                   | 26194  | 27590  | 21254  | 1962   |
| EC:1.3.5.4              | fumarate reductase (quinol)                        | All dominant taxa                   | 584664 | 336100 | 168909 | 229927 |
| EC:1.2.7.3/ EC:1.2.7.11 | 2-oxoglutarate/2-oxoacid ferredoxin oxidoreductase | <i>Acidobacteria</i> Subdivision 2  | 17486  | 2626   | 10900  | 764    |
|                         |                                                    | Ga0077536                           | 142844 | 57242  | 18244  | 97734  |
|                         |                                                    | Uncultured, <i>Euzebyaceae</i>      | 19134  | 4064   | 14     | 0      |
|                         |                                                    | 11-24 ( <i>Blastocatellia</i> )     | 19659  | 10329  | 4116   | 546    |
|                         |                                                    | <i>Crossiella</i>                   | 65601  | 25915  | 10409  | 2899   |
|                         |                                                    | <i>Candidatus</i> Methyloirabilis   | 8001   | 44877  | 31128  | 36     |

|             |                                    |                                         |        |                   |        |        |
|-------------|------------------------------------|-----------------------------------------|--------|-------------------|--------|--------|
|             |                                    | Elev-16S-976 ( <i>Actinobacteria</i> )  | 3248   | 6021              | 6729   | 37     |
|             |                                    | Uncultured,<br><i>Gemmatimonadaceae</i> | 2544   | 9034              | 8058   | 4      |
|             |                                    | <i>Nitrospira</i>                       | 176    | 306               | 388    | 100    |
| EC:1.2.7.1  | pyruvate:ferredoxin oxidoreductase | Ga0077536                               | 142844 | 57242             | 18244  | 97734  |
|             |                                    | <i>Crossiella</i>                       | 16387  | 6476              | 2602   | 0      |
|             |                                    | Uncultured, <i>Euzebyaceae</i>          | 9567   | 2032              | 7      | 0      |
|             |                                    | Uncultured,<br><i>Burkholderiaceae</i>  | 9194   | 5203              | 2239   | 2      |
|             |                                    | 11-24 ( <i>Blastocatellia</i> )         | 6553   | 3443              | 1372   | 182    |
|             |                                    | <i>Candidatus</i> Methylomirabilis      | 5334   | 29918             | 20752  | 24     |
|             |                                    | wb1-p19                                 | 1630   | 11126             | 7866   | 40     |
|             |                                    | <i>Acidobacteria</i> Subdivision 2      | 943    | 4429              | 3696   | 1      |
|             |                                    | Elev-16S-976 ( <i>Actinobacteria</i> )  | 812    | 1505              | 1682   | 9      |
|             |                                    |                                         |        | <i>Nitrospira</i> | 123871 | 132451 |
| EC:6.3.4.14 | biotin carboxylase                 | All dominant taxa                       | 264401 | 168185            | 86294  | 63071  |
| EC:6.2.1.1  | acetyl-CoA synthase                | All dominant taxa                       | 256576 | 171858            | 88490  | 64312  |

|             |                                 |                                        |        |        |        |        |
|-------------|---------------------------------|----------------------------------------|--------|--------|--------|--------|
| EC:6.4.1.2  | Acetyl-CoA carboxylase          | All dominant taxa                      | 718207 | 441981 | 224296 | 188801 |
| EC:6.4.1.3  | Propionyl-CoA carboxylase       | Uncultured, <i>Beijerinckiaceae</i>    | 32182  | 20354  | 10684  | 298    |
|             |                                 | Uncultured, <i>Euzebyaceae</i>         | 38268  | 8128   | 28     | 0      |
|             |                                 | <i>Crossiella</i>                      | 114815 | 45354  | 18216  | 5798   |
|             |                                 | 11-24 ( <i>Blastocatellia</i> )        | 6553   | 3443   | 1372   | 182    |
|             |                                 | IMCC26256                              | 2236   | 15026  | 8724   | 0      |
|             |                                 | Elev-16S-976 ( <i>Actinobacteria</i> ) | 5684   | 10537  | 11776  | 65     |
|             |                                 | Uncultured, <i>Gemmatimonadaceae</i>   | 1272   | 4517   | 4029   | 2      |
|             |                                 | <i>Polaromonas</i>                     | 78     | 11914  | 7850   | 90     |
|             |                                 | MND1                                   | 70     | 386    | 322    | 9      |
|             |                                 | IS-44                                  | 11     | 11     | 103    | 2      |
|             |                                 | <i>Hyphomicrobium</i>                  | 9465   | 8215   | 4259   | 3036   |
| EC:4.1.1.31 | Phosphoenolpyruvate carboxylase | Ga0077536                              | 71845  | 28648  | 9136   | 52676  |
|             |                                 | wb1-p19                                | 47872  | 17264  | 5766   | 299    |
|             |                                 | <i>Crossiella</i>                      | 16414  | 6481   | 2602   | 1449   |
|             |                                 | Uncultured, <i>Beijerinckiaceae</i>    | 32182  | 20354  | 10684  | 298    |

|            |                    |                                               |        |        |        |        |
|------------|--------------------|-----------------------------------------------|--------|--------|--------|--------|
|            |                    | Uncultured, <i>Euzebyaceae</i>                | 9567   | 2032   | 7      | 0      |
|            |                    | Uncultured, <i>Burkholderiaceae</i>           | 9194   | 5203   | 2239   | 2      |
|            |                    | PLTA13                                        | 14336  | 3557   | 343    | 10     |
|            |                    | Uncultured, <i>Gemmatimonadaceae</i>          | 1272   | 4517   | 4029   | 2      |
|            |                    | <i>Steroidobacter</i>                         | 1304   | 296    | 53     | 6855   |
|            |                    | Elev-16S-976 ( <i>Actinobacteria</i> )        | 812    | 1505   | 1682   | 9      |
|            |                    | <i>Nitrospira</i>                             | 2      | 0      | 0      | 0      |
|            |                    | <i>Polaromonas</i>                            | 39     | 5959   | 3929   | 45     |
|            |                    | MND1                                          | 5      | 24     | 13     | 1      |
|            |                    | IS-44                                         | 2369   | 3441   | 2166   | 3      |
|            |                    | <i>Hyphomicrobium</i>                         | 2690   | 3105   | 1563   | 571    |
| EC:4.2.1.1 | carbonic anhydrase | All dominant taxa, except <i>Rokubacteria</i> | 387218 | 220535 | 105867 | 112758 |

**Supplemental Table 4.** Selection of enzymes related to nitrogen metabolism. The EC number abundance predicted by PICRUSt2 show how each dominant taxon is contributing to each predicted enzyme per sample.

| EC Number     | Enzyme description    | Taxa                                      | Abundance |         |         |          |
|---------------|-----------------------|-------------------------------------------|-----------|---------|---------|----------|
|               |                       |                                           | MZ03-3C   | MZ03-8H | MZ03-2B | MZ03-10J |
| EC:1.14.99.39 | Ammonia monooxygenase | Uncultured,<br><i>Beijerinckiaceae</i>    | 16091     | 10177   | 5342    | 149      |
|               |                       | <i>Hyphomicrobium</i>                     | 24        | 8       | 1       | 5        |
|               |                       | <i>Nitrospira</i>                         | 6         | 9       | 5       | 0        |
|               |                       | MND1                                      | 12        | 432     | 259     | 1        |
|               |                       | IS-44                                     | 2437      | 3783    | 2690    | 43       |
| EC:1.18.6.1   | Nitrogenase           | Ga0077536                                 | 214266    | 85863   | 27366   | 146601   |
|               |                       | Uncultured,<br><i>Beijerinckiaceae</i>    | 48273     | 30531   | 16026   | 447      |
|               |                       | <i>Crossiella</i>                         | 49160     | 19429   | 7807    | 1        |
|               |                       | Elev-16S-976<br>( <i>Actinobacteria</i> ) | 2436      | 4516    | 5047    | 28       |
|               |                       | <i>Hyphomicrobium</i>                     | 120       | 49      | 31      | 9        |
|               |                       | MND1                                      | 3         | 13      | 21      | 2        |

|                |                                 |                                      |        |        |        |        |
|----------------|---------------------------------|--------------------------------------|--------|--------|--------|--------|
|                |                                 | IS-44                                | 0      | 3      | 8      | 0      |
|                |                                 | <i>Polaromonas</i>                   | 0      | 3      | 22.5   | 0      |
| EC:1.4.1.13-14 | Glutamate synthase              | All dominant taxa                    | 413828 | 249537 | 120549 | 125466 |
| EC:1.4.1.2-4   | Glutamate dehydrogenase         | PLTA13                               | 14336  | 3557   | 343    | 10     |
|                |                                 | <i>Steroidobacter</i>                | 1304   | 296    | 53     | 1304   |
|                |                                 | Uncultured, <i>Euzebyaceae</i>       | 9567   | 2032   | 7      | 0      |
|                |                                 | <i>Crossiella</i>                    | 27     | 5      | 0      | 1449   |
|                |                                 | Ga0077536                            | 423    | 27     | 14     | 3809   |
|                |                                 | <i>Hyphomicrobium</i>                | 29     | 11     | 2      | 3      |
| EC:1.4.7.1     | Glutamate synthase (ferredoxin) | Uncultured, <i>Gemmatimonadaceae</i> | 1272   | 4517   | 4029   | 2      |
| EC:1.7.1.15    | Nitrite reductase (NADH)        | Uncultured, <i>Beijerinckiaceae</i>  | 16091  | 10177  | 5342   | 149    |
|                |                                 | Uncultured, <i>Euzebyaceae</i>       | 19134  | 4064   | 14     | 0      |
|                |                                 | 11-24 ( <i>Blastocatellia</i> )      | 6553   | 3443   | 1372   | 182    |
|                |                                 | <i>Crossiella</i>                    | 32827  | 12963  | 5205   | 2899   |
|                |                                 | Uncultured, <i>Burkholderiaceae</i>  | 18388  | 10406  | 4478   | 4      |



|             |                                       |                                           |       |       |      |       |
|-------------|---------------------------------------|-------------------------------------------|-------|-------|------|-------|
|             |                                       | Elev-16S-976<br>( <i>Actinobacteria</i> ) | 1624  | 3011  | 3365 | 19    |
|             |                                       | Ga0077536                                 | 126   | 14    | 5    | 2843  |
|             |                                       | <i>Hyphomicrobium</i>                     | 1986  | 735   | 142  | 45    |
| EC:1.7.2.1  | Nitrite reductase (NO-forming)        | Uncultured,<br><i>Gemmatimonadaceae</i>   | 1272  | 4517  | 4029 | 2     |
|             |                                       | <i>Hyphomicrobium</i>                     | 1986  | 735   | 142  | 45    |
| EC:1.7.2.4  | Nitrous-oxide reductase               | Uncultured,<br><i>Gemmatimonadaceae</i>   | 1272  | 4517  | 4029 | 2     |
|             |                                       | <i>Hyphomicrobium</i>                     | 1986  | 735   | 142  | 45    |
| EC:1.7.2.5  | Nitric-oxide reductase (cytochrome c) | <i>Hyphomicrobium</i>                     | 4242  | 2729  | 1128 | 553   |
|             |                                       | MND1                                      | 1     | 5     | 11   | 1     |
|             |                                       | IS-44                                     | 7     | 7     | 53   | 1     |
|             |                                       | <i>Polaromonas</i>                        | 1     | 68    | 159  | 1     |
| EC:1.7.7.1  | Ferredoxin--nitrite reductase         | Uncultured,<br><i>Beijerinckiaceae</i>    | 16091 | 10177 | 5342 | 149   |
|             |                                       | <i>Hyphomicrobium</i>                     | 2729  | 2162  | 937  | 74    |
| EC:1.7.99.1 | Hydroxylamine reductase               | Ga0077536                                 | 71422 | 28621 | 9122 | 48867 |
|             |                                       | MND1                                      | 2     | 2     | 14   | 1     |

|             |                   |                                        |       |       |       |      |
|-------------|-------------------|----------------------------------------|-------|-------|-------|------|
|             |                   | IS-44                                  | 0     | 3     | 3     | 0    |
|             |                   | <i>Nitrospira</i>                      | 438   | 486   | 716   | 69   |
|             |                   | <i>Hyphomicrobium</i>                  | 4     | 0     | 0     | 0    |
|             |                   | <i>Polaromonas</i>                     | 0     | 0     | 8     | 0    |
| EC:1.7.99.4 | Nitrate reductase | wb1-p19                                | 47872 | 17264 | 5766  | 299  |
|             |                   | Uncultured,<br><i>Beijerinckiaceae</i> | 16091 | 10177 | 5342  | 149  |
|             |                   | PLTA13                                 | 6736  | 1416  | 79    | 8    |
|             |                   | Uncultured, <i>Euzebyaceae</i>         | 9567  | 2032  | 7     | 0    |
|             |                   | <i>Hyphomicrobium</i>                  | 5188  | 5200  | 2467  | 647  |
|             |                   | Uncultured,<br><i>Burkholderiaceae</i> | 9194  | 5203  | 2239  | 2    |
|             |                   | <i>Polaromonas</i>                     | 156   | 23823 | 15703 | 96   |
|             |                   | MND1                                   | 0     | 1     | 1     | 2    |
|             |                   | IS-44                                  | 1     | 1     | 0     | 0    |
|             |                   | <i>Nitrospira</i>                      | 39398 | 41455 | 31008 | 3351 |
|             |                   | 11-24 ( <i>Blastocatellia</i> )        | 13106 | 6886  | 2744  | 364  |

|             |                    |                                               |        |        |        |        |
|-------------|--------------------|-----------------------------------------------|--------|--------|--------|--------|
| EC:4.2.1.1  | Carbonic anhydrase | All dominant taxa, except <i>Rokubacteria</i> | 387218 | 220535 | 105867 | 112758 |
| EC:2.7.2.2  | Carbamate kinase   | <i>Polaromonas</i>                            | 0      | 5      | 7      | 0      |
|             |                    | MND1                                          | 0      | 0      | 1      | 0      |
|             |                    | <i>Nitrospira</i>                             | 1      | 11     | 14     | 0      |
|             |                    | <i>Hyphomicrobium</i>                         | 1      | 1      | 2      | 0      |
| EC:3.5.1.49 | Formamidase        | <i>Hyphomicrobium</i>                         | 15     | 7      | 7      | 0      |
|             |                    | <i>Polaromonas</i>                            | 48     | 6788   | 5218   | 26     |
|             |                    | MND1                                          | 0      | 0      | 6      | 0      |
|             |                    | IS-44                                         | 0      | 2      | 42     | 1      |
| EC:3.5.1.5  | Urease             | PLTA13                                        | 20208  | 4248   | 237    | 24     |
|             |                    | Ga0077536                                     | 214266 | 85863  | 27366  | 146601 |
|             |                    | Uncultured, <i>Euzebyaceae</i>                | 9567   | 2032   | 7      | 0      |
|             |                    | <i>Crossiella</i>                             | 49187  | 19434  | 7807   | 1450   |
|             |                    | Uncultured, <i>Burkholderiaceae</i>           | 27582  | 15609  | 6717   | 6      |
|             |                    | <i>Polaromonas</i>                            | 132    | 18717  | 12801  | 144    |

|              |                          |                                           |        |        |        |       |
|--------------|--------------------------|-------------------------------------------|--------|--------|--------|-------|
|              |                          | Elev-16S-976<br>( <i>Actinobacteria</i> ) | 2436   | 4516   | 5047   | 28    |
|              |                          | <i>Hyphomicrobium</i>                     | 560    | 3217   | 2102   | 1579  |
|              |                          | <i>Nitrospira</i>                         | 4243   | 2661   | 2115   | 258   |
|              |                          | IS-44                                     | 0      | 16     | 55     | 0     |
|              |                          | MND1                                      | 0      | 2      | 2      | 2     |
| EC:4.2.1.104 | Cyanase                  | <i>Hyphomicrobium</i>                     | 16     | 6      | 1      | 1     |
|              |                          | <i>Nitrospira</i>                         | 12972  | 13623  | 10353  | 906   |
|              |                          | <i>Polaromonas</i>                        | 45     | 6334   | 4481   | 62    |
|              |                          | MND1                                      | 0      | 0      | 4      | 0     |
| EC:6.3.1.2   | Glutamate-ammonia ligase | All dominant taxa                         | 333052 | 240385 | 126438 | 68775 |
